# Supplementary material
Source: publisher figshare collection journal article supplement (https://frontiersin.figshare.com/ndownloader/files/16584206)
Supplement: Supplementary file [file 16584206]

## Supplemental Figure S1: Evaluation of total RNA extraction

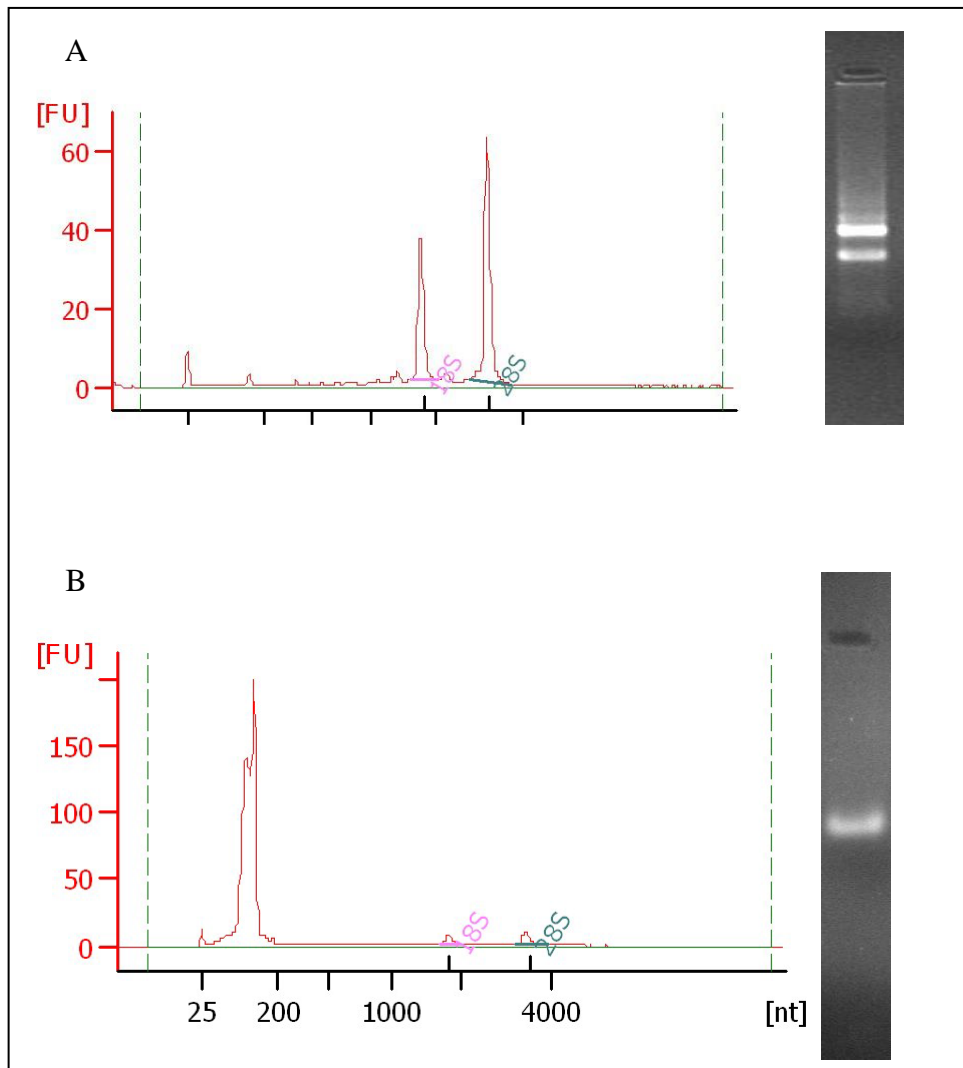

**Figure 1:** Total RNA extraction were evaluated on a RNA nano BioAnalyzer chip (Agilent) as well as by gel electrophoreses. Only samples passing this evaluation step as presented here were used for NGS sequencing. A: total RNA B: small RNA.
